# Supplementary material for: The iron-dependent repressor YtgR is a tryptophan-dependent attenuator of the trpRBA operon in Chlamydia trachomatis
Source: PubMed Central journal article supplement (PMC7755916; doi:10.1038/s41467-020-20181-5), 2020-12-22
Supplement: 41467_2020_20181_MOESM3_ESM.pdf [file 41467_2020_20181_MOESM3_ESM.pdf]

## Description of Additional Supplementary Files

File Name: Supplementary Data 1

Description: Predicted TrpL leader peptide sequences from candidate species identified by Merino, et al. (2008).

File Name: Supplementary Data 2

Description: Complete list of oligonucleotide primers used in this study.

File Name: Supplementary Data 3

Description: Nucleotide sequences generated from 5' pRACE analysis.

File Name: Supplementary Data 4

Description: Nucleotide BLAST results for 5' pRACE sequencing analysis.

File Name: Supplementary Data 5

Description: File containing all amino acid sequences of CTL0325 (YtgCR) and CTL0174 used for multiple sequence alignments.

File Name: Supplementary Data 6

Description: Complete multiple sequence alignments for CTL0174.

File Name: Supplementary Data 7

Description: Complete multiple sequence alignments for CTL0325 (YtgCR).

File Name: Supplementary Data 8

Description: Summary of PASIFIC analysis results.

File Name: Supplementary Data 9

Description: Nucleotide sequences used for PASIFIC analysis.

File Name: Supplementary Software 1

Description: File containing the source code for all figures and statistics generated in R Studio using ggplot2 and ggpubr packages.
